# Supplementary material for: Wearable Inertial Gait Algorithms: Impact of Wear Location and Environment in Healthy and Parkinson’s Populations
Source: MDPI journal article supplement (doi:10.3390/s21196476), 2021-09-28
Supplement: s1 [file s1]

## Supplementary Materials

### Algorithm 1 (Pseudocode)

```

1: Filter raw vertical hip acceleration signal (The 4th order Butterworth filter with 10 Hz cut off frequency)
2: Acceleration correction to horizontal-vertical frame [33]
3: Integrated_av: Numerical integration of vertical acceleration of hip in the horizontal-vertical frame (cumtrapz)
4: IC_moments = Gaussian continuous wavelet transforms at scale 10 (Integrated_av)
5: FC_moments= Further differentiation of IC_moments
6: for i=1: size (IC_moments)
7: IC=find local minima in IC_moments
8: end for
9: for i=1: size (FC_moments)
10: FC=find local maxima in FC_moments
11: end for
12: Return IC and FC

```

### Algorithm 2 (Pseudocode)

```

1: Wavelet decomposition (5th order coiflet, at scale 10) of shin sagittal plane angular velocity
2: Get two new approximations (a1 and a2) with appcoef function
3: ms_a1= Find peaks in a1 to locate mid swing
4: ms_a2= Find peaks in a2 to locate mid swing
4: for i=1: size (a1)
5: IC=find local minima in the range of [ms_a1+0.25s, ms_a1+2s]
6: end for
7: for i=1: size (a2)
8: FC=find local minima in the range of [ms_a2-2s, ms_a2-0.05s]
9: end for
10: Return IC and FC

```

Note: step time statistical formula is presented in Table S1 only, the same formulas are used for the remaining temporal outcomes.

**Table S1.** Formulas used to calculate temporal parameters along with statistical results

|                         | Temporal parameter formula (left side only)                                                                              |
|-------------------------|--------------------------------------------------------------------------------------------------------------------------|
| <b>Algorithm 1 (A1)</b> | Stride Time= IC(i+2) - IC(i), Stance Time= FC(i+1) - IC(i),<br>Swing Time= IC(i+2) - FC(i+1), Step Time= IC(i+1) - IC(i) |
| <b>Algorithm 2 (A2)</b> | Stride Time= IC(j+2) - IC(j), Stance Time= FC(j+1) - IC(j),<br>Swing Time= IC(j+2) - FC(j+1), Step Time= IC(j+1) - IC(j) |
|                         | <b>Statistical formulas (both sides-for Step Time only)</b>                                                              |
| <b>Mean</b>             | $(\text{mean}(\text{Step time}_{\text{left}}) + (\text{Step time}_{\text{right}}))/2$                                    |
| <b>Variability</b>      | $\sqrt{(\text{var}(\text{Step time}_{\text{left}}) + \text{var}(\text{Step time}_{\text{right}}))/2}$                    |
| <b>Asymmetry</b>        | $ \text{mean}(\text{Step time}_{\text{left}}) - \text{mean}(\text{Step time}_{\text{right}}) $                           |
